# Supplementary material
Source: publisher site journal article supplement (https://www.spandidos-publications.com/1684/downloadSupplementary)
Supplement: Supplementary file 1 [file downloadSupplementary]

## Sheet: Table S7
Table SVII. List of the novel sRNAs differentially expressed in asymptomatic HTLV-1 infected subjects with monoclonal T cell expansion (ASM) and polyclonal T cell expansion (ASP) versus healthy controls (HC)
Gene ID	p (Corr)	p	FC ([ASM] vs [HC])	Log FC ([ASM] vs [HC])	FC (abs) ([ASM] vs [HC])	Regulation ([ASM] vs [HC])	FC ([ASP] vs [HC])	Log FC ([ASP] vs [HC])	FC (abs) ([ASP] vs [HC])	Regulation ([ASP] vs [HC])	Gene Type
NEWGENE8	1.50E-08	2.60E-09	-53254967	-5734844	53254967	down	-39880672	-5317618	39880672	down	Unknown
NEWGENE1104	4.22E-07	1.46E-07	47590347	5572597	47590347	up	3959438	5307224	3959438	up	snoRNA
NEWGENE1111	3.76E-09	4.34E-10	5263028	5717821	5263028	up	3062427	49366035	3062427	up	snoRNA
NEWGENE568	2.38E-09	1.97E-10	-8711239	-31228778	8711239	down	-8739794	-31275992	8739794	down	Unknown
NEWGENE1117	2.13E-04	1.03E-04	-10872361	-34425933	10872361	down	-1465452	-38732738	1465452	down	miRNA
NEWGENE57	0.005145231	0.003166296	22206082	11509548	22206082	up	27063344	14363401	27063344	up	Unknown
NEWGENE845	1.66E-08	3.50E-09	-33407738	-50621104	33407738	down	-24056997	-45883846	24056997	down	Unknown
NEWGENE851	6.59E-05	2.79E-05	40819683	2029265	40819683	up	5157584	23666954	5157584	up	Unknown
NEWGENE971	0.001496729	8.63E-04	-4334276	-2115791	4334276	down	-48540215	-22791805	48540215	down	Unknown
NEWGENE983	0.004621373	0.002755049	-21391017	-10970051	21391017	down	-12435688	-0.31448624	12435688	down	Unknown
NEWGENE99	1.50E-08	2.32E-09	-23456108	-4551892	23456108	down	-144435005	-38523486	144435005	down	Unknown
NEWGENE119	0.006013634	0.004047638	-44629145	-21579862	44629145	down	-3327103	-17342665	3327103	down	Unknown
NEWGENE159	2.29E-08	5.27E-09	-31273481	-4966868	31273481	down	-39534527	-53050413	39534527	down	Unknown
NEWGENE81	3.18E-04	1.65E-04	-581157	-2538928	581157	down	-13101587	-37116697	13101587	down	Unknown
NEWGENE1221	9.96E-06	3.83E-06	-1214976	-3602856	1214976	down	-17619698	-41391172	17619698	down	snoRNA
NEWGENE156	2.00E-11	3.84E-13	-16443286	-7361355	16443286	down	-107358215	-6746289	107358215	down	Unknown
NEWGENE917	1.06E-07	3.07E-08	-10798551	-34327657	10798551	down	-1500209	-39070916	1500209	down	Unknown
NEWGENE945	4.09E-04	2.20E-04	-136765375	-3773631	136765375	down	-12603895	-36557977	12603895	down	Unknown
NEWGENE208	8.93E-05	3.95E-05	-8874166	-31496115	8874166	down	-8587891	-31023037	8587891	down	Unknown
NEWGENE271	2.51E-04	1.26E-04	-90875025	-3183884	90875025	down	-53046923	-2407269	53046923	down	Unknown
NEWGENE1301	2.27E-05	9.16E-06	6935345	27939677	6935345	up	74448457	2896242	74448457	up	tRNA
NEWGENE1021	2.66E-07	8.17E-08	-16279638	-40249968	16279638	down	-19160593	-42600703	19160593	down	Unknown
NEWGENE1317	7.08E-10	4.08E-11	15654128	39684713	15654128	up	12398135	36320512	12398135	up	miRNA
NEWGENE264	7.41E-09	9.98E-10	-24634262	-46225944	24634262	down	-15682862	-3971117	15682862	down	Unknown
NEWGENE323	0.006013634	0.004029617	-39303486	-19746573	39303486	down	-19880528	-0.9913561	19880528	down	Unknown
NEWGENE338	5.11E-08	1.38E-08	-15297827	-39352548	15297827	down	-11824602	-35637197	11824602	down	Unknown
NEWGENE1354	1.51E-08	2.90E-09	61708168	59473896	61708168	up	3914007	52905746	3914007	up	snoRNA
NEWGENE557	2.38E-09	2.29E-10	-48436764	-55980306	48436764	down	-37361023	-5223462	37361023	down	Unknown
NEWGENE1376	7.50E-04	4.18E-04	29952972	15826992	29952972	up	3930668	19747746	3930668	up	snoRNA
NEWGENE912	3.15E-07	1.03E-07	46861572	55503335	46861572	up	3649697	5189705	3649697	up	Unknown
NEWGENE458	0.01005447	0.006960787	-5532605	-2467959	5532605	down	-37535977	-1908274	37535977	down	Unknown
NEWGENE538	0.005247652	0.003330241	-27120168	-14393661	27120168	down	-33316891	-17362537	33316891	down	Unknown
NEWGENE533	0.032555778	0.023164688	-3621735	-1856681	3621735	down	-16404004	-0.714048	16404004	down	Unknown
NEWGENE1519	1.07E-04	4.96E-05	4954006	23085957	4954006	up	51120853	23539119	51120853	up	snoRNA
NEWGENE671	4.49E-10	1.73E-11	-53756214	-57483597	53756214	down	-51616375	-5689757	51616375	down	Unknown
NEWGENE747	2.41E-08	6.02E-09	-18360308	-41985183	18360308	down	-24717451	-4627458	24717451	down	Unknown
NEWGENE784	1.98E-06	7.25E-07	-47521988	-55705233	47521988	down	-31226217	-4964686	31226217	down	Unknown
